# Supplementary material
Source: Springer Nature journal article supplement (https://www.springermedizin.de/resource/supplementary/12876_2007_317_MOESM9_ESM.pdf/9439152)

DDD/1000 inhabitants/day

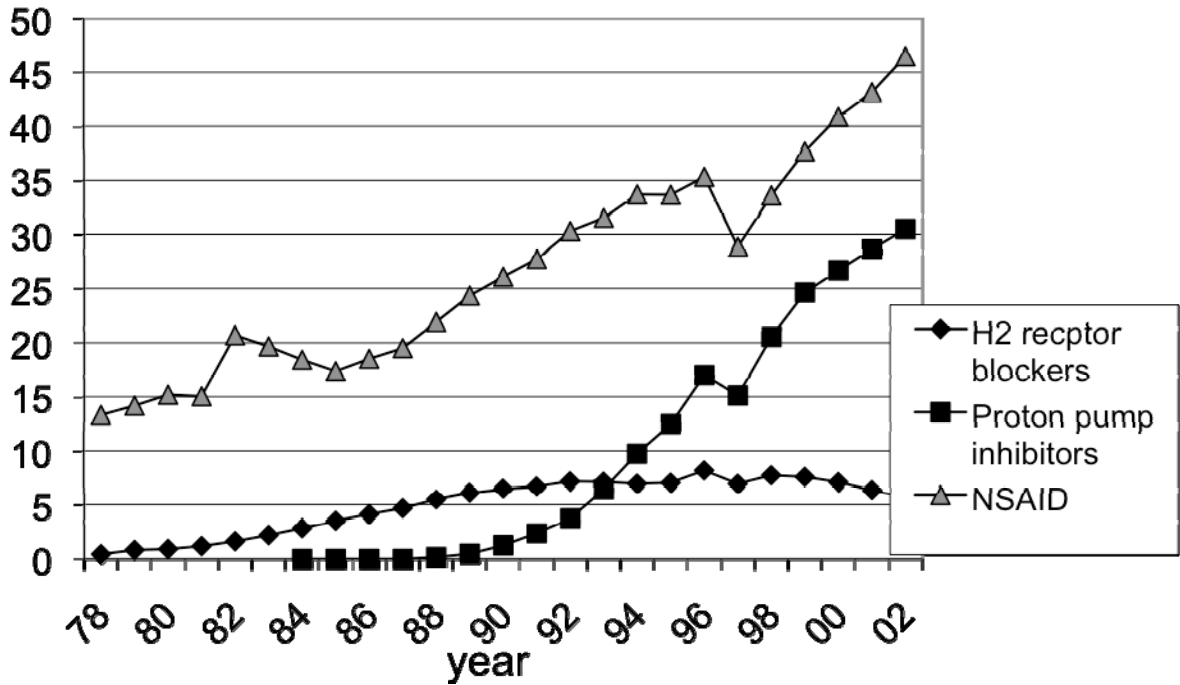

Supplement: MOESM9 [file 9439152]
